# Supplementary material for: Nutrient pathways and their susceptibility to past and future change in the Eurasian Arctic Ocean
Source: PubMed Central journal article supplement (PMC8692559; doi:10.1007/s13280-021-01673-0), 2021-12-16
Supplement: 13280_2021_1673_MOESM1_ESM.pdf [file 13280_2021_1673_MOESM1_ESM.pdf]

Supplementary Information for:

## Nutrient pathways and their susceptibility to past and future change in the Eurasian Arctic Ocean

### Temporal trends

Data used for temporal trends were taken within the geographical range of 70-80°N and 0-50°E. To overcome sampling variability, we only used summer nutrient measurements to look at changes in the upper water column (June-September). We also only used samples with salinities >34.6, this includes AW and ArW but reduces the effects of dilution on the nutrient concentrations and trends.

Table S1. 0-25m

| Dataset             | Data source or DOI                               | Time range | Data points (NO3) | Data points (PO4) | Data points (N*) |
|---------------------|--------------------------------------------------|------------|-------------------|-------------------|------------------|
| Codispoti2013       | 10.1016/j.pocean.2012.11.006                     | 1990-2002  | 148               | 431               | 148              |
| GIPY11              | Geotraces IDP2017                                | 2007       | 7                 | 7                 | 7                |
| JR271               | BODC                                             | 2012       | 13                | 13                | 13               |
| PS94                | BODC                                             | 2015       | 6                 | 6                 | 6                |
| CAO - JR16006       | doi:10.5285/b4c1537e-c729-6463-e053-6c86abc0c7de | 2017       | 14                | 14                | 14               |
| CAO - JR17006       | 10.5285/b62f2d5d-1f3f-0c2c-e053-6c86abc0265d     | 2018       | 12                | 3                 | 3                |
| CAO - JR17007       | 10.5285/b62f2d5d-1f40-0c2c-e053-6c86abc0265d     | 2018       | 3                 |                   |                  |
| Kattner2011<br>PS68 | Pangaea<br>10.1594/PANGAEA.761684                | 2005       | 51                | 53                | 46               |

Table S2. 0-100m

| Dataset             | Data source or DOI                               | Time range | Data points (NO3) | Data points (PO4) | Data points (N*) |
|---------------------|--------------------------------------------------|------------|-------------------|-------------------|------------------|
| Codispoti2013       | 10.1016/j.pocean.2012.11.006                     | 1990-2002  | 168               | 514               | 168              |
| GIPY11              | Geotraces IDP2017                                | 2007       | 9                 | 9                 | 9                |
| JR271               | BODC                                             | 2012       | 12                | 6                 | 6                |
| PS94                | BODC                                             | 2015       | 8                 | 8                 | 8                |
| CAO - JR16006       | doi:10.5285/b4c1537e-c729-6463-e053-6c86abc0c7de | 2017       | 20                | 16                | 16               |
| CAO - JR17006       | 10.5285/b62f2d5d-1f3f-0c2c-e053-6c86abc0265d     | 2018       | 16                |                   |                  |
| CAO - JR17007       | 10.5285/b62f2d5d-1f40-0c2c-e053-6c86abc0265d     | 2018       | 7                 | 3                 | 3                |
| Kattner2011<br>PS68 | Pangaea<br>10.1594/PANGAEA.761684                | 2005       | 58                | 60                |                  |

Table S3. 200-300m

| Dataset | Data source or DOI | Time range | Data points (NO3) | Data points (PO4) | Data points (N*) |
|---------|--------------------|------------|-------------------|-------------------|------------------|
|---------|--------------------|------------|-------------------|-------------------|------------------|

|                     |                                                  |           |     |     |     |
|---------------------|--------------------------------------------------|-----------|-----|-----|-----|
| Codispoti2013       | 10.1016/j.pocean.2012.11.006                     | 1990-2002 | 149 | 149 | 149 |
| JR271               | BODC                                             | 2012      | 9   | 9   | 9   |
| PS94                | BODC                                             | 2015      | 4   | 4   | 4   |
| CAO - JR16006       | doi:10.5285/b4c1537e-c729-6463-e053-6c86abc0c7de | 2017      | 7   | 7   | 7   |
| CAO - JR17005       | 10.5285/b61d58df-b8e8-11c4-e053-6c86abc0246c     | 2018      | 2   | 2   | 2   |
| CAO - JR17006       | 10.5285/b62f2d5d-1f3f-0c2c-e053-6c86abc0265d     | 2018      | 6   | 6   | 6   |
| CAO - JR17007       | 10.5285/b62f2d5d-1f40-0c2c-e053-6c86abc0265d     | 2018      | 2   | 2   | 2   |
| Kattner2011<br>PS68 | Pangaea<br>10.1594/PANGAEA.761684                | 2005      | 45  | 45  | 45  |
